# Supplementary material for: Deposition of an ultra-thin polyaniline coating on a TiO2 surface by vapor phase polymerization for electrochemical glucose sensing and photocatalytic degradation
Source: Royal Society of Chemistry journal article supplement (doi:10.1039/d0ra01571g), 2020-01-01
Supplement: d0ra01571g1.pdf [file d0ra01571g1.pdf]

## Supporting Information

### Ultra-thin Deposition of Polyaniline on TiO<sub>2</sub> Surface by Vapor Phase Polymerization for Electrochemical Glucose Sensor and Photocatalytic Degradation

Sibani Majumdar, Debajyoti Mahanta\*

Department of Chemistry, Gauhati University,

Assam, India-781014

\* To whom correspondence should be addressed

Dr. Debajyoti Mahanta

Tel: +91-6000682511

Fax: +91-0361-2700311

Email: [debam@gauhati.ac.in](mailto:debam@gauhati.ac.in), [debam2@gmail.com](mailto:debam2@gmail.com)

## SI-1 Synthesis of polyaniline

For the preparation of Polyaniline (PANI), 5g aniline was dissolved in 150 mL 1 M HCl and stirred in an ice bath for half an hour. 12.25g APS was dissolved in 50 mL 1 M HCl and kept in an ice bath for 15 min and after that the APS solution was taken in a burette and added to the aniline solution drop wise under constant stirring and the reaction mixture was kept stirring for 6 h. The reaction was carried out at a temperature of 0-5°C. After completion of the reaction, the product obtained was washed with distilled water for several times and dried in air and then kept in a desiccator.

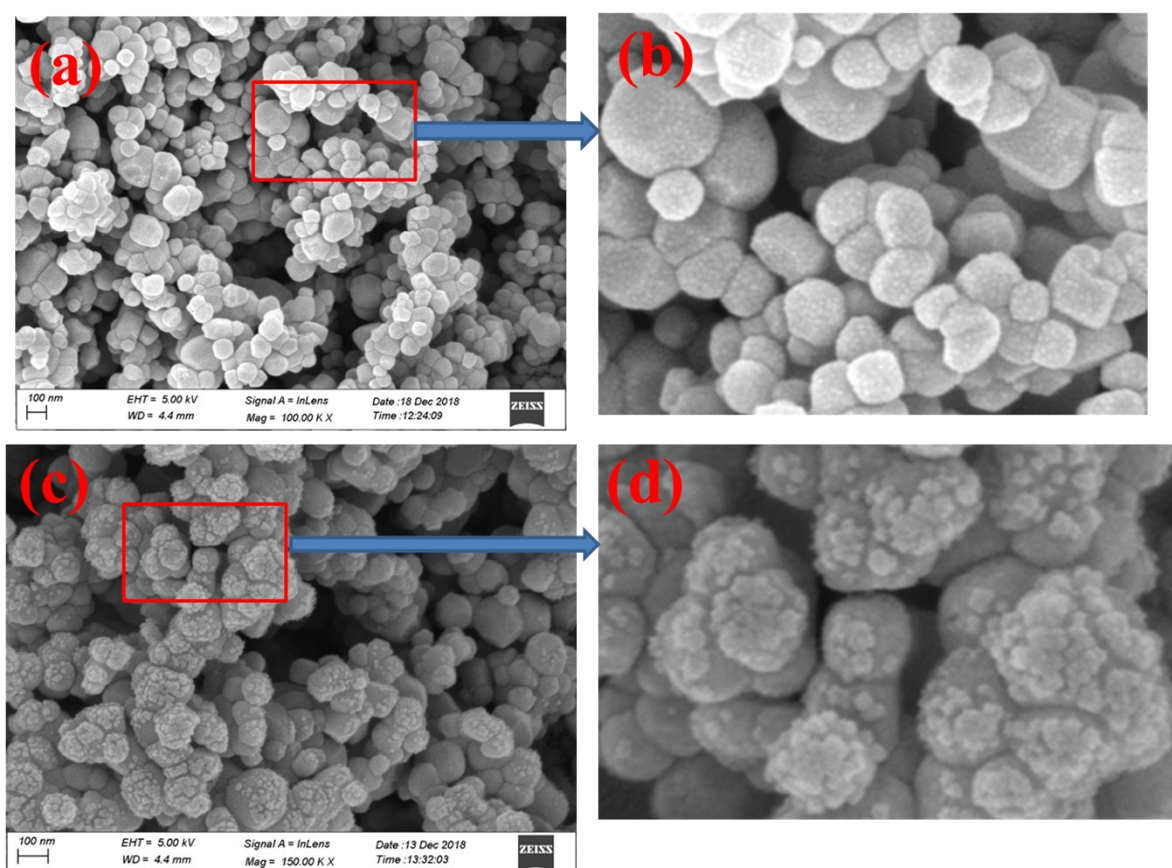

**Figure S1:** (a) SEM image of TiO<sub>2</sub> (b) zoomed image of TiO<sub>2</sub> particles (c) SEM image of PANI-TiO<sub>2</sub> (d) zoomed image of PANI-TiO<sub>2</sub>
